# Supplementary material for: The impact of stroke unit care on outcome in a Scottish stroke population, taking into account case mix and selection bias
Source: HighWire-hosted journal article supplement (doi:10.1136/jnnp-2013-307478), 2014-06-25

Graph 2. Receiver operating characteristic (ROC) curve for mortality at six months. Area under the curve(AUC) of 1 implies a test with perfect sensitivity and specificity, while an area of 0.5 implies that the model's predictions are no better than chance.

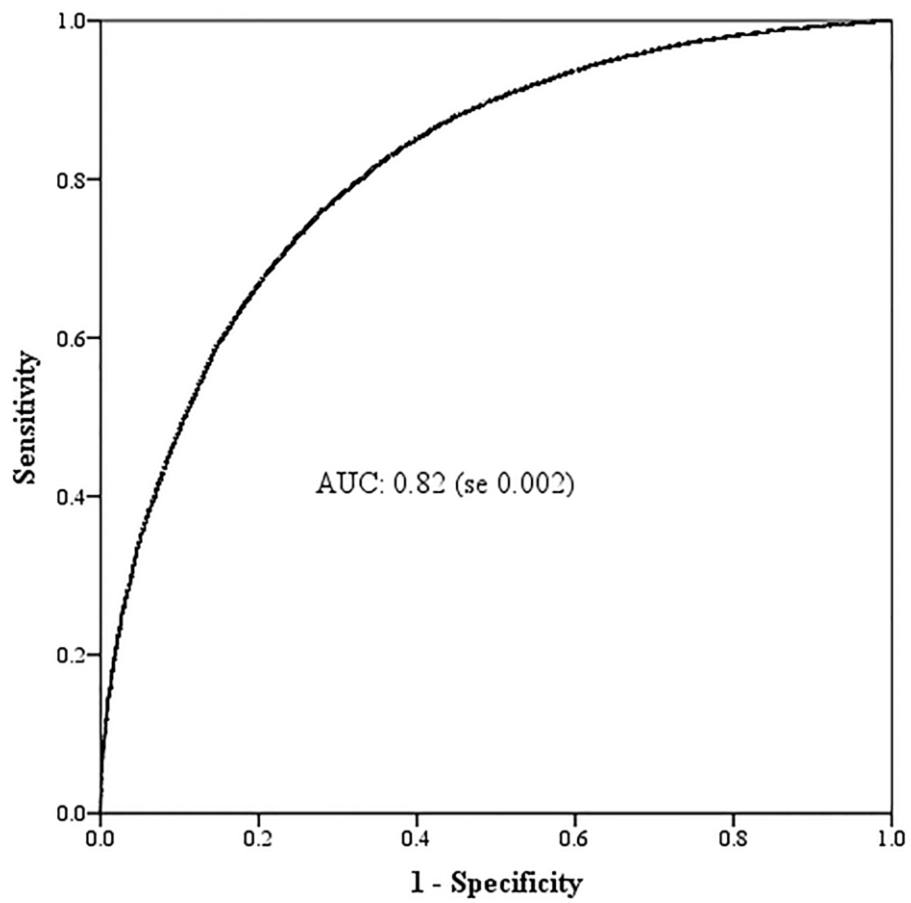

Supplement: jnnp-2013-307478supp.pdf [file jnnp-2013-307478supp.pdf]
